# Supplementary material for: Biochemical characterization of the initial steps of the Kennedy pathway in Trypanosoma brucei: the ethanolamine and choline kinases
Source: PubMed Central journal article supplement — Biochem J. 2008 Sep 12;415(Pt 1):135–44. doi: 10.1042/BJ20080435 (PMC2552378; doi:10.1042/bj20080435), 2008-09-12
Supplement: bj4150135add.pdf [file bj4150135add.pdf]

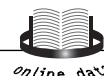

SUPPLEMENTARY ONLINE DATA

Biochemical characterization of the initial steps of the Kennedy pathway in *Trypanosoma brucei*: the ethanolamine and choline kinases

Federica GIBELLINI\*, William N. HUNTER\* and Terry K. SMITH†<sup>1</sup>

\*Division of Biological Chemistry and Drug Discovery, School of Life Sciences, University of Dundee, Dundee DD1 5EH, Scotland, U.K., and †Centre for Biomolecular Sciences, St Andrews University, North Haugh, St Andrews KY16 9ST, Scotland, U.K.

```

1 AAGCTATTATTAGAACAGTTTCTGTACTATATgt t c t c a c t a g c t t a a c g t c t t g t a a c t t t g g a a c t t c c t c t t a g g g g a t a c a t c g c 91
92 c g t a t t g c A T G G C A T T A C G A C C G T T C C C G T T G G G G A A C A C A C C G C T G C A T G C C G T C A T T C G G C G T T C T G C T C G T G A A T T T G A A T G T G T T G A 182
183 G G C G G G A A T T G C C T C G A A T G C T G T T C G T T C A C C T T C A A C T G C A T C A T G G G T T T C T G C A G A G T C C C T T G A T A G T A T C A T T T C A C T G G C T A A C 273
274 C G C A C A T C T G A A G A A T G G A G G T G G A T C A A C T A T T A T C G C C T C T G C C G T T C C C T T T A C C A T G T G G C C A A G A A A A A A T C T G C A C A G A T C C 364
365 A C T G C C A C C C C A A C C A C C A G G A G C G G C A A C A C A C A C A G C A G C A A G C C A G C A G C A G C G G C T G G C G T T C C G T C G A A T G T G A G G G T C A C T T C T C 455
456 C A A C A T G C G C G G C C G T G A G G A C T G G T G C C C G T T G T T G C A C C T C T T T G A T C C A A G G A G T A T T A T A A G G T G A T G G G C A A C C G A G T C A A C A C 546
547 G A C G G G T G C A A A C T T T G T G G T G A T G T G G T G G G T A C A G A G A G C A G T C C T G A A G G T G T T T C G C A G T G G C T G A T G A G C G A A T T G A G C G T A A C G C 637
638 G A C T T A C G G G T G G C A A C A G C A A C C A C G T G A T C G G C T G G G C C A C G C T T C T T T C C C A A G A A A G C T G T T C T C T G C G C G T G A T G G T G A T G G 728
729 T G G T G G G G G T G A C G T G A T T G A C C G G C C G G G A T A T A A A G T A T G C G A C T A T A G A C A A G T C A G A G A T G G G T C C A G G C T T A T T G C A T A C T 819
820 T T C C A C T G G G G C C G C G T T G A G G A A T T A T G G A T G G T G T T G A C G T G C A C G A C G G A G A A G C T C C T A C T T C T C C A T C C C T A C T T G C T G A T G 910
911 T G T A T G G A G G T T A A G T A A G A T G C A T C A G T T G G A T T A C A C G C C G C T T C T G C C A G A A A A C A T G A G G A C A A A G G G A T G T C T A A C G G C A T A A 1001
1002 T T C A T C T C A G A G T G T G A G C G A C A C G G T T T C T A A A T C A G G T G G T G G A C A G A G G G A C C T G A C G G C A C A G T G G G G G C G T G A A T G A G C T G G A A 1092
1093 A G C A C T T G T C A T A C C T C T T T C G A G C G T G A T G T C T C C G G T T G C T T A G G T A G T G T C C T T G A A T G T G G T G G A G G A A C A C C G T C A C T C G C T T G 1183
1184 A G A G C T G G T T A G C T G G T G A G G T C A T G T T C G T G C G A A G G G A A C T G C A A T A T C G T G G G A T A C C G G T G G T G T G T C A C A C A A C G A T C T A A A C C 1274
1275 T G G A A A C A T T C T T C T T T C C G A T G G A G C A G G A G A G G C C A G C G G T A C C G T C T C A G T G A C G A G G A G C T G A G A G T G G A G A A C A C A C C G T T G T C A 1365
1366 A A G C G T A T G T G A C C G A A A A G G C A A A A A C A T G A A C C T T G T G G A G C C C G T G G T T T C C T T T T A T G A T T T T G A G T A C C G G A T G C C A A C T 1456
1457 A C C G C T G C T T C G A C C T T G G G A A C A C G C T T T G C G A G C T G G A C T A C G A C T A T A C C C G T G G A A C A G A A G C G G G A G C C G G G A T T C A T C A A A T A 1547
1548 T C T T T T G T A T T T C C C C C G C C G C A A T G G A G A G G C A T G G C G T G G G C T C G G G A G G A G T A C C C C G C C T G C C G G A G C T A T T T A T G A T G C C 1638
1639 T G G C G T C G T G G C G T G A G T G A T G G A T C G T C G G A T A T C G G C T C T G T G G C T T T G C T C G C C G T G A G A C G T T A C T T C G C A G A G C G G G A C A A T G T G C 1729
1730 C A C T T G A A A C T G T G G A A C T A G T G A A G C T A G G T T G G G A G G T G C T G C T T G G T A T G C T G C C C T C G C A T C T C A T T G G A C A A T C T G G T C G A T 1820
1821 G A C A A T G G G A T C T G C A C C G A T A A T T G C G T T G A A T G C G A G G A C T G C G A T G A T C A G A T G T T G C T G T A G G C G G A A G T G G C T T G A T T A C A T G 1911
1912 C G A T A T G G T G A A T G T C G T C T G C G G G A G T A C A T T G C T C T G C G T G G T T G G C T G C A G A G A A G G G C T T C T T T C C T G A 1986
    
```

Figure S1 Sequence of cDNA of *TbC/EK2*

Highlighted are the mini-exon sequence (grey box), the stuffer sequence (lower case) and the *TbC/EK2* sequence (upper case). Double-underlined is the sequence of the internal reverse primer used to generate *TbC/EK2* cDNA; the sequence downstream of this point is inferred from the genomic sequence.

Received 25 February 2008/16 May 2008; accepted 20 May 2008  
 Published as BJ Immediate Publication 20 May 2008, doi:10.1042/BJ20080435

<sup>1</sup> To whom correspondence should be addressed (email tks1@st-andrews.ac.uk).  
 The nucleotide sequence data reported for choline/ethanolamine kinase and ethanolamine kinase of *Trypanosoma brucei* have been submitted to the DDBJ, EMBL, GenBank® and GSDB Nucleotide Sequence Databases under accession numbers AM939568 and AM939569 respectively.
